# Supplementary material for: IKK-induced NF-κB1 p105 proteolysis is critical for B cell antibody responses to T cell–dependent antigen
Source: PubMed Central journal article supplement — J Exp Med. 2014 Sep 22;211(10):2085–101. doi: 10.1084/jem.20132019 (PMC4172221; doi:10.1084/jem.20132019), 2014-09-22
Supplement: supp_jem.20132019_JEM_20132019_sm.pdf [file supp_jem.20132019_JEM_20132019_sm.pdf]

SUPPLEMENTAL MATERIAL

Jacque et al., <http://www.jem.org/cgi/content/full/jem.20132019/DC1>

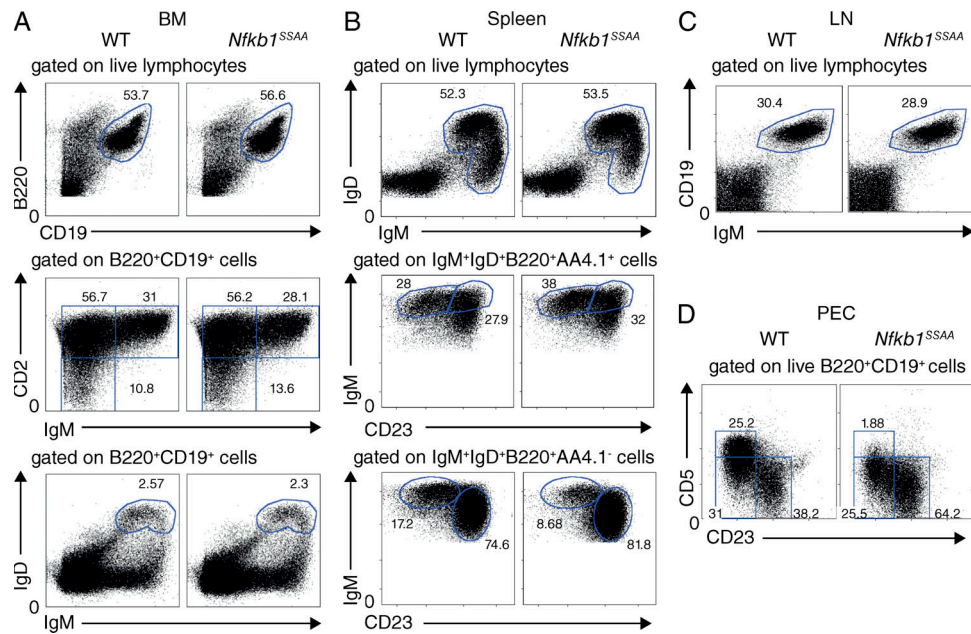

Figure S1. Gating strategies for Fig. 1.

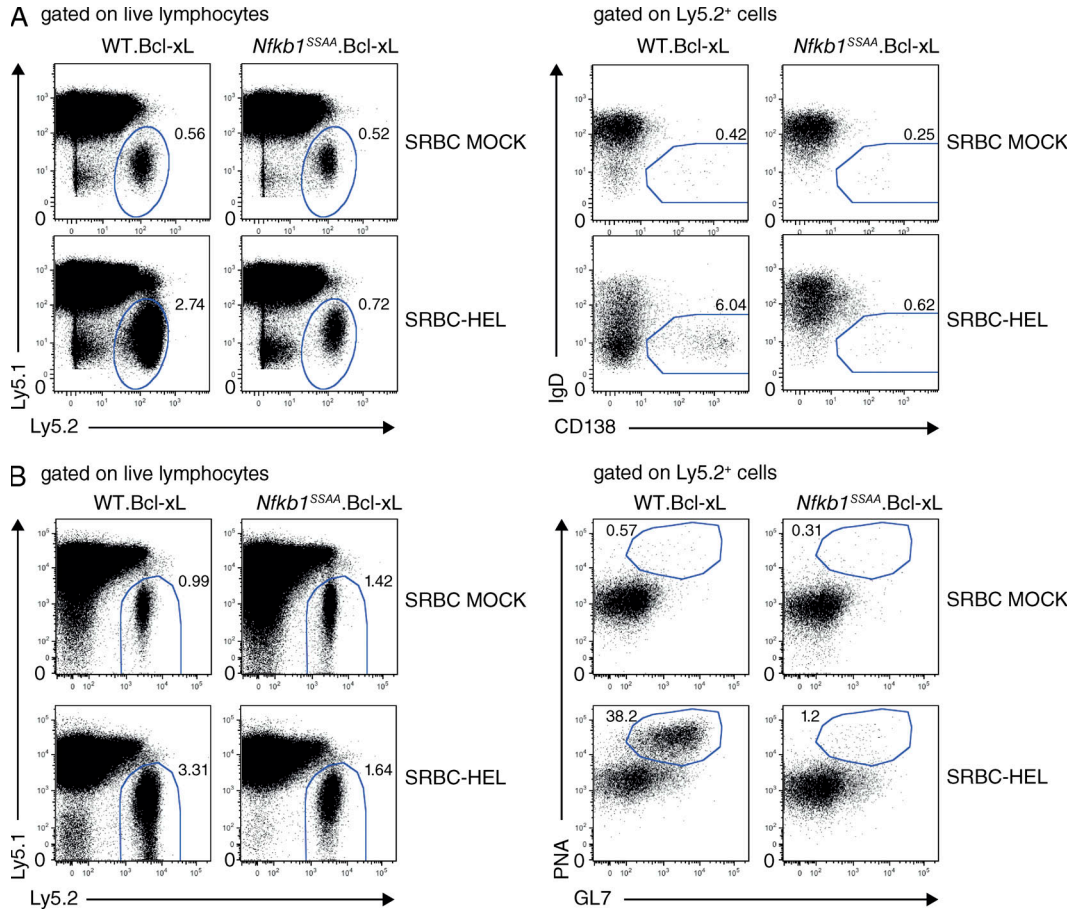

Figure S2. Gating strategies for Fig. 6.

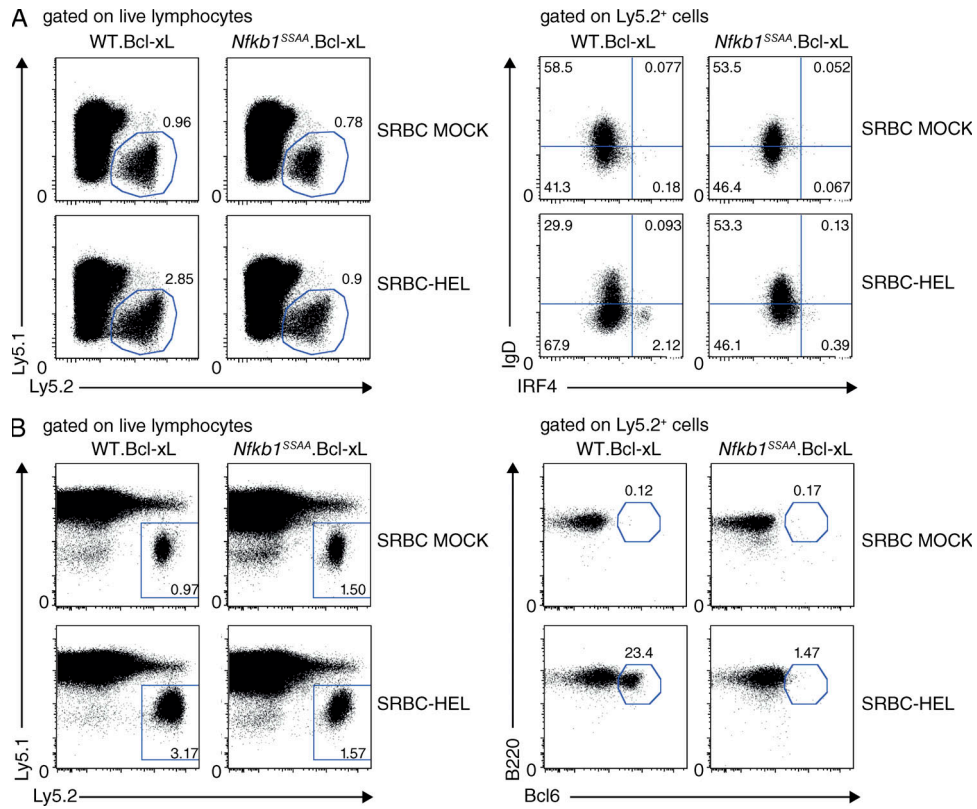

Figure S3. Gating strategies for Fig. 8 . (A) corresponds to Figure 8 E and (B) to Fig. 8 F.

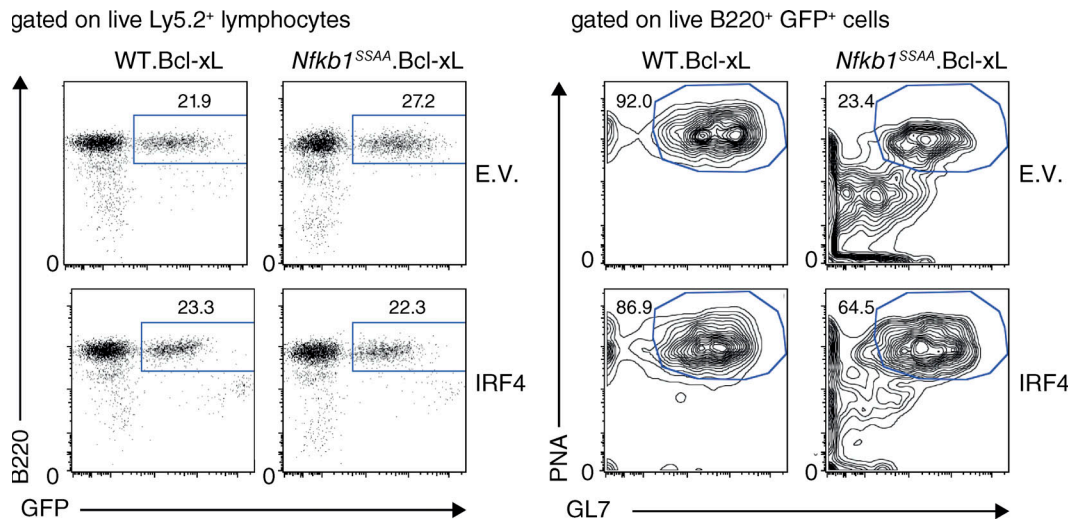

Figure S4. Gating strategies for Fig. 8 H.
